# Supplementary material for: Gene-expression signature regulated by the KEAP1-NRF2-CUL3 axis is associated with a poor prognosis in head and neck squamous cell cancer
Source: BMC Cancer. 2018 Jan 6;18:46. doi: 10.1186/s12885-017-3907-z (PMC5756380; doi:10.1186/s12885-017-3907-z)
Supplement: Supplementary file 2 — List of differentially expressed genes obtained from the RNA-Seq analysis of altered versus wild-type samples. (XLS 29 kb) [file 12885_2017_3907_MOESM2_ESM.xls]

## Sheet: DEG-Up-Altered Vs Wild type
Table S2. List of upregulted genes obtained from the differential expression of altered versus wild type samples
Gene symbol	logFC	logCPM	LR	PValue	FDR
AKR1C3	2.61517	7.32479	117.924	1.80198e-27	7.4297e-26
AKR1C1	2.5294	8.48732	95.2349	1.69083e-22	4.11947e-21
AKR1B10	2.49842	8.33024	118.487	1.35631e-27	6.05818e-26
ALDH3A1	2.4134	8.274	81.2213	2.018e-19	3.86303e-18
OSGIN1	2.26822	4.59491	154.137	2.16202e-35	1.65549e-33
AKR1C2	2.25162	8.13523	77.9875	1.03696e-18	1.79294e-17
GSTM3	2.21027	6.08107	89.6644	2.82183e-21	6.57609e-20
SLC7A11	2.2028	6.25316	99.7315	1.74525e-23	4.92343e-22
RAB6B	2.17573	4.02361	95.7705	1.29004e-22	3.29266e-21
TRIM16L	2.12073	5.28994	177.026	2.16191e-40	2.31756e-38
PTGR1	1.9918	6.29205	195.665	1.84466e-44	4.9437e-42
TXNRD1	1.88022	7.52978	179.165	7.37371e-41	9.88077e-39
G6PD	1.8567	7.60906	258.399	3.83187e-58	2.05388e-55
NQO1	1.80379	7.50487	139.917	2.77516e-32	1.85935e-30
GCLM	1.78797	5.57835	157.373	4.2424e-36	3.78988e-34
SPP1	1.72137	8.37582	42.9297	5.67412e-11	4.47254e-10
MAP2	1.71704	4.52566	72.2754	1.87166e-17	2.95061e-16
SRXN1	1.70024	7.26718	194.465	3.37054e-44	6.02202e-42
HSPA7	1.61876	2.76619	54.5678	1.50179e-13	1.677e-12
EPHX1	1.57733	6.8324	133.765	6.15003e-31	3.29641e-29
NTRK2	1.55665	7.67089	27.8189	1.33219e-07	5.44988e-07
PGD	1.53692	8.2347	136.054	1.94224e-31	1.15671e-29
GSTM4	1.53656	4.76463	86.2784	1.56309e-20	3.10302e-19
GCLC	1.53064	7.02214	112.427	2.88027e-26	1.10273e-24
UCHL1	1.52373	5.48581	29.229	6.43093e-08	2.87248e-07

## Sheet: DEG-Down-Altered Vs Wild type
Table S2. List of downregulted genes obtained from the differential expression of altered versus wild type samples
Gene symbol	logFC	logCPM	LR	PValue	FDR
L1CAM	-1.62229	4.371	27.2015	1.83317e-07	7.27836e-07
ALOX15B	-1.39066	4.7889	17.8441	2.39759e-05	5.20127e-05
WNT10A	-1.3283	4.90837	29.5191	5.53688e-08	2.53656e-07
C6orf105	-1.32132	3.25365	29.7961	4.79949e-08	2.2566e-07
MMP1	-1.3029	9.77359	18.2788	1.90819e-05	4.29743e-05
SFRP1	-1.29949	5.72078	16.5104	4.83837e-05	9.09954e-05
STEAP4	-1.22698	5.63044	18.5146	1.68607e-05	3.87868e-05
PARM1	-1.19003	5.14506	16.7805	4.19613e-05	8.17865e-05
VCAM1	-1.18187	5.91305	13.6288	0.000222739	0.000315008
H19	-1.14098	10.2338	11.5853	0.00066475	0.000716367
MOBKL2B	-1.06957	5.4331	42.1395	8.49891e-11	6.60205e-10
DMD	-1.03575	4.29547	23.2865	1.39576e-06	4.45313e-06
MYOM3	-1.00624	4.62655	11.0802	0.000872522	0.000872892
