# Supplementary material for: Gene-expression signature regulated by the KEAP1-NRF2-CUL3 axis is associated with a poor prognosis in head and neck squamous cell cancer
Source: BMC Cancer. 2018 Jan 6;18:46. doi: 10.1186/s12885-017-3907-z (PMC5756380; doi:10.1186/s12885-017-3907-z)
Supplement: Supplementary file 5 — Multivariate analysis of 17-gene signature in 4 independent cohorts (XLS 25 kb) [file 12885_2017_3907_MOESM5_ESM.xls]

## Sheet: Sheet1
Cohort	Variable	OS/DFS/MFS/RFS
		Hazard ratio	95% CI	p-value
TCGA - HNSCC	Histologic grade
	G1	1.31	0.29 - 5.88	0.7238
	G2	1.78	1.12 - 2.84	0.01412
	G3	2.78	1.3 - 5.94	0.00587
	GX	NA	NA	NA
	Primary tumor T-stage
	T1	14.19	1.53 - 131.5	0.002696
	T2	2.58	1.17 - 5.69	0.01469
	T3	1.87	0.87 - 4.02	0.1037
	T4a	1.49	0.8 -2.77	0.2041
	Clinical group-Stage
	Stage I	NA	NA	NA
	Stage II	2.81	1.08 - 7.33	0.02735
	Stage III	9.85	2.24 - 43.27	0.0002081
	Stage IVA	1.28	0.77 - 2.15	0.3403
	Death
	Alive	NA	NA	NA
	Dead	0.99	0.68 - 1.45	0.9787
Saintigny et al.(GSE26549)	Alcohol history
	Current	4.86	1.72 - 13.73	0.0009797
	Former	NA	NA	NA
	Never	3.37	0.73 - 15.62	0.09635
	Sex
	Female	1.71	0.64 - 4.61	0.2781
	Male	NA	NA	NA
	deltaNp63 expression
	High	1.32	0.48 - 3.67	0.5868
	Low	20.33	2.65 - 156.1	4.31e-05
	Podoplanin expression
	High	3.97	1.54 - 10.27	0.002164
	Low	9.83	1.24 - 78.23	0.008242
	Race
	White	3.91	1.68 - 9.09	0.0006416
	Other	NA	NA	NA
	Smoking history
	Current	3.7	0.67 - 20.61	0.1101
	Former	4.1	1.19 - 14.13	0.01531
	Never	4.53	0.94 - 21.87	0.03837
	Treatment arm
	Beta-carotene	2.11	0.5 - 8.8	0.2957
	13-cis-retinoic acid	7.8	2.25 - 27.03	0.000145
	Retinyl palmitate	3.97	0.48 - 33.15	0.1653
Jung et al. (E-MTAB-1328)	TNM Stage
	Stage 2	1.44	0.16 - 12.99	0.7449
	Stage 3	0.81	0.15 - 4.43	0.8082
	Stage 4	3.92	1.74 - 8.86	0.0003616
	Sex
	Female	NA	NA	NA
	Male	2.35	1.22 - 4.53	0.007765
	Tumor location
	Hypopharynx	2.58	1.07 - 6.24	0.02668
	Oropharynx	4.23	1.21 - 14.75	0.01356
	Gum, floor of the mouth, oral cavity	1.39	0.13 - 15.44	0.788
Cohen et al. (GSE10300)	Recurrence censor
	Recurrence censor = Alive	NA	NA	NA
	Recurrence censor = Dead	0.91	0.24 - 3.46	0.8946
	Death censor (1 dead_0 alive)
	Censor (Alive (27))	NA	NA	NA
	Censor (Dead (14))	0.917	0.18 - 4.69	0.917
OS-TCGA - HNSCC
DFS-Saintigny et al. (GSE26549)
MFS-Jung et al. (E-MTAB-1328)
RFS-Cohen et al. (GSE10300)
*NA-Not applicable (statistically flawed result due to the low number of patient’s data or statistical insignificance or data doesn’t exist in the analyzed results)
